# Supplementary material
Source: PubMed Central journal article supplement (PMC2860919)
Supplement: JCI40494sd.pdf [file JCI40494sd.pdf]

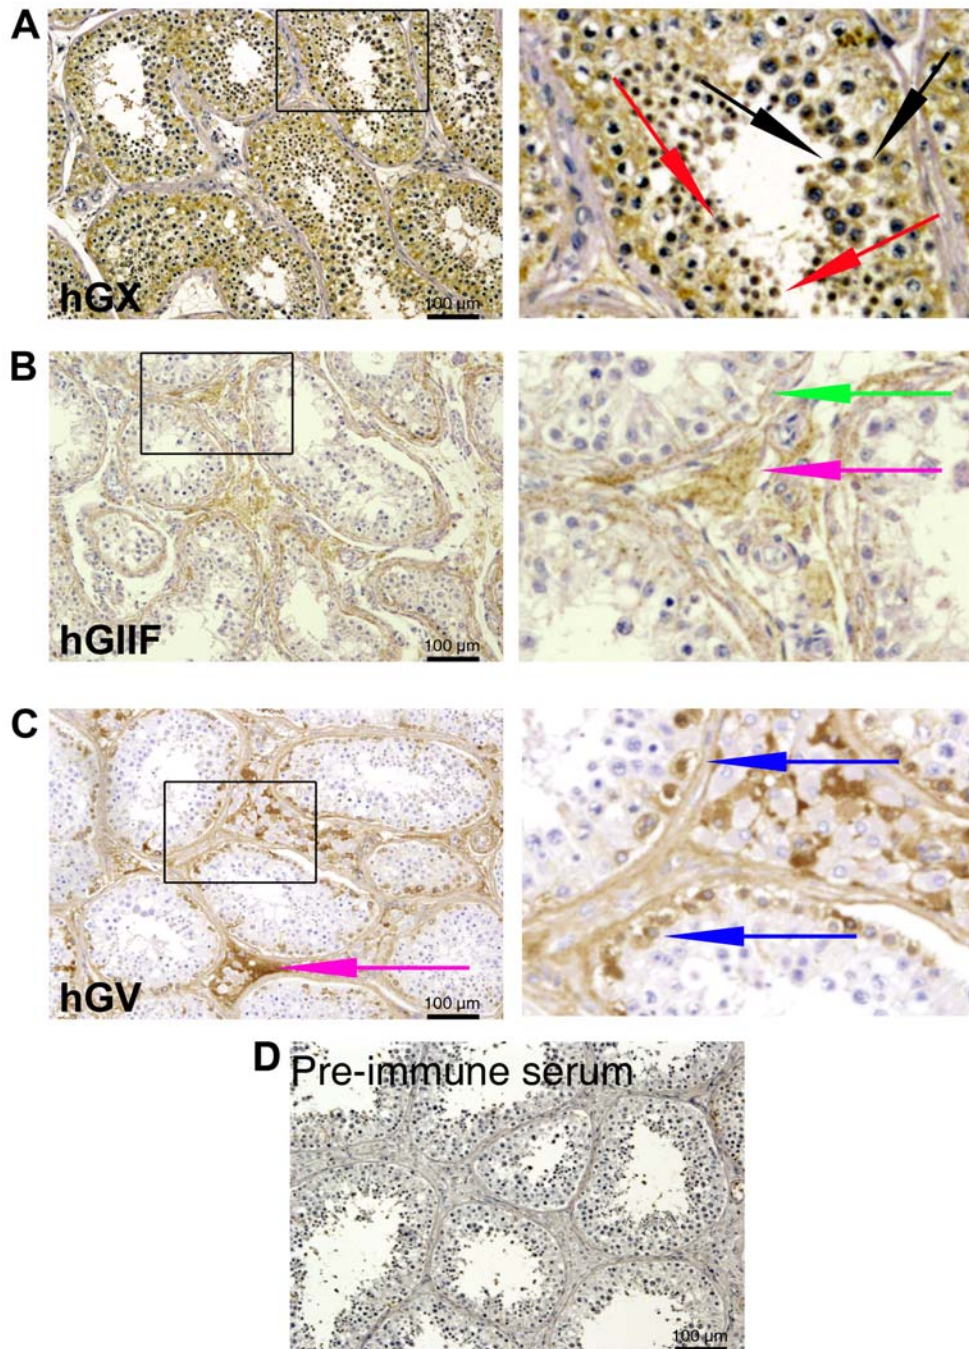

**Figure S1**

**Group X sPLA<sub>2</sub> is expressed in human spermatids.**

Immunohistochemistry of human testis performed with different antibodies raised against human sPLA<sub>2</sub>s. **(A)** hGX sPLA<sub>2</sub> is strongly expressed in spermatogenic cells except spermatogonia. Left: cross section of human seminiferous tubules at low magnification. Right: enlargement of the boxed region in the left panel: a strong staining surrounds spermatocytes (black arrows) and spermatids (red arrows). **(B)** Cross section of human seminiferous tubules at low magnification. Right: enlargement of the boxed region in the left panel: hGIIF sPLA<sub>2</sub> is strongly expressed in Leydig cells (purple arrows) and in testis boundary layers (green arrows) **(C)** hGV sPLA<sub>2</sub> is strongly expressed in Leydig cells (purple arrows) and spermatogonia (blue arrows). **(D)** Staining obtained with pre-immune serum.
